# Supplementary material for: Professionally led support groups for people living with advanced or metastatic cancer: a systematic scoping review of effectiveness and factors critical to implementation success within real-world healthcare and community settings
Source: Springer Nature journal article supplement (doi:10.1007/s11764-023-01515-w), 2024-01-08
Supplement: MOESM1 [file 11764_2023_1515_MOESM1_ESM.pdf]

## Key concepts and Mesh terms

| KEY CONCEPTS          |                |                               |
|-----------------------|----------------|-------------------------------|
| Cancer                | Advanced stage | Support groups                |
| KEYWORDS              |                |                               |
| Cancer                | Advance        | "Support group"               |
| Neoplasm              | Metastasis     | "Support intervention"        |
| Tumor or tumour*      | Disseminated   | Self-help group*              |
| Oncology              | Progression    | Online support group*         |
|                       | Inoperable     | Social media support group*   |
|                       | Incurable      |                               |
|                       | Chronic        |                               |
|                       | Recurrent      |                               |
|                       | Relapse        |                               |
|                       | Palliative     |                               |
|                       | Protracted     |                               |
|                       | "end stage"    |                               |
| MeSH Subject Headings |                |                               |
| exp Neoplasm/         |                | Social support/               |
| exp Cancer/           |                | Psychosocial support systems/ |
| Neoplasm Metastasis/  |                |                               |
| Oncology/             |                |                               |
| Psycho-Oncology/      |                |                               |

## Search string MEDLINE and PsychINFO (15 December 2021)

| #  | Searches                                                                                                                                                                    |
|----|-----------------------------------------------------------------------------------------------------------------------------------------------------------------------------|
| 1  | cancer.mp.                                                                                                                                                                  |
| 2  | exp Cancer/                                                                                                                                                                 |
| 3  | ((tumour* or tumor*) adj3 cancer*).tw.                                                                                                                                      |
| 4  | oncolog*.mp. or Integrative Oncology/ or Psycho-Oncology/                                                                                                                   |
| 5  | exp Neoplasms/                                                                                                                                                              |
| 6  | Neoplasm Metastasis/                                                                                                                                                        |
| 7  | or/1-6                                                                                                                                                                      |
| 8  | Disease progression/                                                                                                                                                        |
| 9  | (and/7) adj3 (advance* or metasta* or dissemin* or progress* or incurab* or inoperab* or chronic or recur* or relaps* or palliative* or protracted or "end stage").mp.      |
| 10 | or/8-9                                                                                                                                                                      |
| 11 | social support/ or psychosocial support systems/                                                                                                                            |
| 12 | ("support group" or "support intervention").mp. [mp=title, abstract, heading word, table of contents, key concepts, original title, tests & measures, mesh word]            |
| 13 | Self-Help Groups/                                                                                                                                                           |
| 14 | Self-help group*.mp.                                                                                                                                                        |
| 15 | Support group*.mp.                                                                                                                                                          |
| 16 | (Online support group* or social media support group*).mp. [mp=title, abstract, heading word, table of contents, key concepts, original title, tests & measures, mesh word] |
| 17 | or/11-16                                                                                                                                                                    |
| 18 | and/7,10,17                                                                                                                                                                 |

## Search string CINAHL (15 December 2021)

|                          |    |                                                                                                                                                                                                                                                                                                                                                         |                                                                        |
|--------------------------|----|---------------------------------------------------------------------------------------------------------------------------------------------------------------------------------------------------------------------------------------------------------------------------------------------------------------------------------------------------------|------------------------------------------------------------------------|
| <input type="checkbox"/> | S8 |  S1 AND S6 AND S7                                                                                                                                                                                                                                                      | Expanders - Apply equivalent subjects<br>Search modes - Boolean/Phrase |
| <input type="checkbox"/> | S7 |  S2 OR S3                                                                                                                                                                                                                                                              | Expanders - Apply equivalent subjects<br>Search modes - Boolean/Phrase |
| <input type="checkbox"/> | S6 |  S4 OR S5                                                                                                                                                                                                                                                              | Expanders - Apply equivalent subjects<br>Search modes - Boolean/Phrase |
| <input type="checkbox"/> | S5 |  "support groups or support intervention or psychosocial support"                                                                                                                                                                                                      | Expanders - Apply equivalent subjects<br>Search modes - Boolean/Phrase |
| <input type="checkbox"/> | S4 |  (MM "Support Groups+") OR (MM "Psychotherapy, Group+") OR (MM "Support, Psychosocial+")                                                                                                                                                                               | Expanders - Apply equivalent subjects<br>Search modes - Boolean/Phrase |
| <input type="checkbox"/> | S3 |  ("advance*" OR metastas*" OR dissemi*" OR progress*" OR incurab*" OR inoperab*" OR chronic OR recur*" OR relaps*" OR palliative OR protracted OR "end stage") OR (MH "Neoplasm Metastasis+") OR "metastasis" OR (MH "Palliative Care") OR "palliative" OR "end stage" | Expanders - Apply equivalent subjects<br>Search modes - Boolean/Phrase |
| <input type="checkbox"/> | S2 |  (MM "Disease Progression+") AND "disease progression"                                                                                                                                                                                                                 | Expanders - Apply equivalent subjects<br>Search modes - Boolean/Phrase |
| <input type="checkbox"/> | S1 |  "cancer" OR (MM "Neoplasm Metastasis+") OR "tumour" OR (MM "Oncology+") OR "oncology" OR (MH "Psycho-Oncology") OR (MH "Oncologic Care+")                                                                                                                             | Expanders - Apply equivalent subjects<br>Search modes - Boolean/Phrase |
